# Supplementary material for: Dermatological remedies in the traditional pharmacopoeia of Vulture-Alto Bradano, inland southern Italy
Source: Springer Nature journal article supplement (doi:10.1186/1746-4269-4-5), 2008-02-06
Supplement: Additional file 1 [file 1746-4269-4-5-s1.pdf]

Additional file 1. Popular uses of botanical materials for dermatological conditions and topical (external) applications

| <i>Botanical taxon<br/>(voucher<br/>specimen code)</i> | <i>Botanical family</i> | <i>Vernacular<br/>name in<br/>Vulture-Alto<br/>Bradano</i> | <i>English<br/>name</i> | <i>Status</i> | <i>Part(s)<br/>used</i> | <i>Preparation and<br/>application</i>                                                                                        | <i>Popular use</i>                | <i>Consensus<br/>index</i><br>♦ <10%<br>♦♦ 10-20%<br>♦♦♦ 21-30%<br>♦♦♦♦ 31-40%<br>♦♦♦♦♦ >40% | <i>Records of similar<br/>use in other<br/>Italian<br/>ethnobotanical<br/>studies conducted<br/>in mainland<br/>southern Italy</i> |
|--------------------------------------------------------|-------------------------|------------------------------------------------------------|-------------------------|---------------|-------------------------|-------------------------------------------------------------------------------------------------------------------------------|-----------------------------------|----------------------------------------------------------------------------------------------|------------------------------------------------------------------------------------------------------------------------------------|
| <i>Aesculus<br/>hippocastanum</i><br>L.                | Sapindaceae             | <i>castagna<br/>bastarda</i>                               | horse<br>chestnut       | W             | fruit                   | Fresh fruits are split in half and seeped in alcohol for 40 days and then used to massage swollen or sore legs.               | Analgesic;<br>anti-oedemic        | ♦                                                                                            | None                                                                                                                               |
|                                                        |                         |                                                            |                         |               | bark and<br>leaves      | A decoction is made of the bark and leaves then mixed with olive oil or pig fat to make an ointment. It is applied topically. | Anti-<br>haemorrhoid              | ♦                                                                                            | None                                                                                                                               |
| <i>Allium cepa</i> L.<br>(CQ-206)                      | Alliaceae               | <i>cipudda</i>                                             | onion                   | C             | bulb                    | Slice of bulb is warmed, and then a drop of olive oil and sugar is added. This is then topically applied.                     | Anti-furuncle;<br>anti-abscess    | ♦                                                                                            | [1, 2]                                                                                                                             |
|                                                        |                         |                                                            |                         |               | bulb                    | Slice of fresh bulb is rubbed on burned skin.                                                                                 | Vulnerary (for<br>burn<br>wounds) | ♦                                                                                            | None                                                                                                                               |
|                                                        |                         |                                                            |                         |               | bulb<br>membrane        | Applied topically (like a Band-Aid) to small lacerations.                                                                     | Haemostatic                       | ♦♦                                                                                           | [3]                                                                                                                                |
|                                                        |                         |                                                            |                         |               | leaves                  | Fresh leaves are used to tie strips of bark from <i>Ulmus</i>                                                                 | Splint for<br>broken or           | ♦                                                                                            | None                                                                                                                               |

|                                     |           |                       |                          |   |                                       |                                                                           |                                                                      |      |              |
|-------------------------------------|-----------|-----------------------|--------------------------|---|---------------------------------------|---------------------------------------------------------------------------|----------------------------------------------------------------------|------|--------------|
|                                     |           |                       |                          |   |                                       | <i>minor</i> L. around the affected limb.                                 | severely bruised bones                                               |      |              |
| <i>Allium sativum</i> L.            | Alliaceae | <i>aglǰē</i>          | garlic                   | C | bulb                                  | Piece of bulb is crushed and rubbed onto nipple of breast-feeding mother. | Wean baby from breast milk                                           | ◆    | None         |
|                                     |           |                       |                          |   |                                       | Bulb is boiled, and then while still hot, it is rubbed onto a callus.     | Anti-callus; analgesic (for callus)                                  | ◆    | [4, 5]       |
|                                     |           |                       |                          |   |                                       | Pieces of fresh bulb (small cloves) are kept in mouth to suck on.         | Against sore throat                                                  | ◆    | None         |
|                                     |           |                       |                          |   |                                       | Fresh pieces of bulb are chewed.                                          | Against toothache; anti-gingivitis                                   | ◆    | [5, 6]       |
|                                     |           |                       |                          |   |                                       | Fresh bulb is rubbed onto the skin where stung by an insect.              | Anti-sting/anti-itch (for insect bite)                               | ◆◆   | [1, 2, 4, 7] |
| <i>Arum italicum</i> Mill. (CQ-175) | Araceae   | <i>frugnē n cuttē</i> | Italian lords and ladies | W | leaves                                | Fresh leaf applied topically. It will "stick" to the skin.                | Analgesic (for insect stings and burns); vulnerary (for burn wounds) | ◆◆   | None         |
| <i>Arundo donax</i> L. (CQ-146)     | Poaceae   | <i>cannē</i>          | giant reed               | W | white hemi-cellulose membrane at node | Topically applied to lacerations.                                         | Haemostatic                                                          | ◆◆◆◆ | [1-3, 5]     |
|                                     |           |                       |                          |   |                                       | Topically applied to mouth sores on lips (but                             | Anti-herpes (of the                                                  | ◆    | None         |

|                                     |              |                  |                 |   |              |                                                                                                                                       |                                                  |        |             |
|-------------------------------------|--------------|------------------|-----------------|---|--------------|---------------------------------------------------------------------------------------------------------------------------------------|--------------------------------------------------|--------|-------------|
|                                     |              |                  |                 |   |              | not inside the mouth or on tongue).                                                                                                   | mouth)                                           |        |             |
|                                     |              |                  |                 |   | stem         | Stem is cut so that it will fit onto the fingers. These <i>canned</i> are worn to protect the fingers during the grain harvest.       | Physical protection of fingers                   | ◆◆     | None        |
|                                     |              |                  |                 |   |              | Green stem is cut into 9 tooth-size pieces which are used in the ritual healing of toothache.                                         | Against toothache                                | ◆      | None        |
| <i>Ballota nigra</i> L.<br>(CQ-160) | Lamiaceae    | <i>erba cane</i> | black horehound | W | aerial parts | Decoction is used as a skin wash.                                                                                                     | Anti-inflammatory<br>Haemostatic                 | ◆<br>◆ | None<br>[2] |
| <i>Brassica oleracea</i> L.         | Brassicaceae | <i>cavolo</i>    | cabbage         | C | leaf         | Heated and topically applied for pain relief.                                                                                         | Anti-rheumatic;<br>anti-arthritis;<br>analgesic  | ◆      | [5, 7]      |
|                                     |              |                  |                 |   |              | Fresh leaf is wrapped around injured area of limb, and then held in place with a bandage. Frequently used on horse legs.              | ♣ Analgesic and anti-inflammatory for tendonitis | ◆      | None        |
|                                     |              |                  |                 |   |              | Fresh leaf applied to engorged breast of lactating woman.                                                                             | anti-lactic;<br>anti-mastitis                    | ◆      | [2]         |
| <i>Cannabis sativa</i> L.           | Cannabaceae  | <i>canapē</i>    | hemp            | W | fibers       | Hemp fibers ( <i>stoppē</i> ) are coated in well-beaten egg white and used to make a hard cast ( <i>stoppata</i> ) for setting bones. | Cast for broken or severely bruised bones        | ◆      | None        |

|                                                               |               |                              |                       |   |                                 |                                                                                                                                     |                                                                  |    |             |
|---------------------------------------------------------------|---------------|------------------------------|-----------------------|---|---------------------------------|-------------------------------------------------------------------------------------------------------------------------------------|------------------------------------------------------------------|----|-------------|
| <i>Capsicum<br/>annuum</i> L.                                 | Solanaceae    | <i>pepperoni<br/>picantē</i> | sweet<br>pepper       | C | fruit                           | Dried and rubbed onto<br>nipple of breast-feeding<br>mother.                                                                        | Wean baby<br>from breast<br>milk                                 | ◆  | None        |
| <i>Cyclamen<br/>hederifolium</i> L.<br>(CQ-186)               | Myrsinaceae   | <i>ciclamino</i>             | hardy<br>cyclamen     | W | tuber                           | Black skin of fresh tuber is<br>removed, and then the<br>rest of tuber is grated to<br>make a poultice for<br>topical applications. | Anti-wart                                                        | ◆  | None        |
| <i>Ecballium<br/>elaterium</i> (L.) A.<br>Richard<br>(CQ-169) | Cucurbitaceae | <i>u cuppē ti<br/>ridzē</i>  | squirting<br>cucumber | W | leaf                            | Heated and topically<br>applied.                                                                                                    | Anti-abscess                                                     | ◆  | None        |
|                                                               |               |                              |                       |   |                                 | Fresh leaf is wrapped<br>around painful limb.                                                                                       | Anti-<br>rheumatic;<br>anti-<br>inflammatory<br>; analgesic      | ◆  | None        |
| <i>Ficus carica</i> L.<br>(CQ-173)                            | Moraceae      | <i>fēchē</i>                 | fig                   | C | latex from<br>immature<br>fruit | Topically applied.                                                                                                                  | Anti-callus;<br>anti-corn<br>(feet)                              | ◆  | [7]         |
|                                                               |               |                              |                       |   |                                 |                                                                                                                                     | Anti-wart                                                        | ◆◆ | [1, 2, 5-8] |
|                                                               |               |                              |                       |   |                                 |                                                                                                                                     | Anti-itch (for<br>itchy<br>dermatitis);<br>anti-<br>inflammatory | ◆  | None        |
|                                                               |               |                              |                       |   |                                 |                                                                                                                                     | Anti-<br>sting/anti-itch<br>(for insect<br>bites)                | ◆  | [2, 4, 7]   |
| Topically applied to                                          |               |                              |                       |   |                                 |                                                                                                                                     | Anti-herpes                                                      | ◆  | None        |

|                                                              |              |                                  |                 |    |                 |                                                                                                                                                      |                                           |   |      |
|--------------------------------------------------------------|--------------|----------------------------------|-----------------|----|-----------------|------------------------------------------------------------------------------------------------------------------------------------------------------|-------------------------------------------|---|------|
|                                                              |              |                                  |                 |    |                 | mouth sores on lips (but not inside the mouth or on tongue).                                                                                         | (of the mouth)                            |   |      |
|                                                              |              |                                  |                 |    | leaf            | Fresh leaf is placed on breast as compress.                                                                                                          | Anti-mastitis                             | ◆ | None |
| <i>Foeniculum vulgare</i> ssp. <i>vulgare</i> Mill. (CQ-196) | Apiaceae     | <i>fēnocchē</i>                  | fennel          | W  | seeds           | Seeds are chewed by another person and the resulting aromatic breath is blown into the inflamed or red eyes of the patient.                          | Anti-conjunctivitis                       | ◆ | None |
| <i>Hordeum vulgare</i> L.                                    | Poaceae      | <i>orzo</i>                      | barley          | C  | fruits (grains) | Boiled and placed in cloth to be used as warm compress that is applied to the throat.                                                                | Against sore throat                       | ◆ | None |
| <i>Hypericum perforatum</i> L. (CQ-183)                      | Hypericaceae | <i>erva pē rē cuttē; iperico</i> | St. John's Wort | W  | aerial parts    | Fresh aerial parts are used to make an oleolite (heated in olive oil). When the oil has cooled, it is used to massage injured or swollen horse legs. | ♣ Anti-inflammatory; emollient; vulnerary | ◆ | [4]  |
| <i>Juglans regia</i> L. (CQ-181)                             | Juglandaceae | <i>noce</i>                      | walnut          | SC | bark            | Decoction used as mouth wash or gargle.                                                                                                              | Against toothache                         | ◆ | None |
|                                                              |              |                                  |                 |    | flowers         | Topically applied as ritual object in spiritual healing of <i>mal d'arco</i> (rainbow illness).                                                      | Against "Rainbow illness"                 | ◆ | None |
|                                                              |              |                                  |                 |    | leaves          | Fresh leaves topically applied to areas of swelling from varicose veins. This is done at                                                             | Heals varicose veins; reduces swelling of | ◆ | [6]  |

|                                     |           |              |               |   |                              |                                                                                                                                                              |                                                                   |    |           |
|-------------------------------------|-----------|--------------|---------------|---|------------------------------|--------------------------------------------------------------------------------------------------------------------------------------------------------------|-------------------------------------------------------------------|----|-----------|
|                                     |           |              |               |   |                              | night and the leaves are held in place with a bandage.                                                                                                       | legs                                                              |    |           |
| <i>Malva sylvestris</i> L. (CQ-156) | Malvaceae | <i>malvĕ</i> | common mallow | W | aerial parts (or just stems) | Decoction – once cooled, it is used as a wash for infants. Some also make the decoction together with the dried aerial parts of <i>Matricaria recutita</i> . | Anti-dermatitis (babies); Against heat- and diaper-rash in babies | ◆  | None      |
|                                     |           |              |               |   |                              | Decoction is used as a mouth wash.                                                                                                                           | Against toothache (dental abscess)                                | ◆  | [4, 7, 9] |
|                                     |           |              |               |   | leaves                       | Fresh leaf applied topically; changed 2-3 times a day.                                                                                                       | Anti-bruise                                                       | ◆  | None      |
|                                     |           |              |               |   |                              | Fresh leaf is heated over a fire and applied topically as compress; compress is changed 2-3 times a day.                                                     | Anti-furuncle; anti-abscess                                       | ◆◆ | [5, 8]    |
|                                     |           |              |               |   |                              | Fresh leaves are boiled and placed into cloth sack to use as a warm compress; compress is changed 2-3 times a day.                                           | Anti-mastitis                                                     | ◆◆ | [5]       |
|                                     |           |              |               |   |                              | Leaves are boiled and placed into a cloth sack to use as a compress that is held on the jaw or cheek.                                                        | Against toothache (dental abscess)                                | ◆  | None      |
|                                     |           |              |               |   |                              | Leaves are boiled and packed into the space where rotten teeth have                                                                                          | Against toothache (dental                                         | ◆  | None      |

|                                        |            |                  |                  |   |                              |                                                                                                                                                                                           |                                                                         |      |              |
|----------------------------------------|------------|------------------|------------------|---|------------------------------|-------------------------------------------------------------------------------------------------------------------------------------------------------------------------------------------|-------------------------------------------------------------------------|------|--------------|
|                                        |            |                  |                  |   |                              | fallen out or areas of acute pain from toothache.                                                                                                                                         | abscess)                                                                |      |              |
| <i>Marrubium vulgare</i> L. (CQ-170)   | Lamiaceae  | <i>marruggē</i>  | white horehound  | W | aerial parts                 | Decoction is made and used as a wash for the affected area. The decoction is left on the skin to air dry. This is repeated 2-3 times a day until healed.                                  | ♣ Anti-furuncle; anti-abscess; anti-cyst (used on humans and livestock) | ◆◆◆  | [2, 9]       |
|                                        |            |                  |                  |   |                              |                                                                                                                                                                                           | Anti-dermatitis                                                         | ◆    | [5]          |
|                                        |            |                  |                  |   |                              |                                                                                                                                                                                           | Anti-fungal (for foot fungus)                                           | ◆    | None         |
|                                        |            |                  |                  |   |                              |                                                                                                                                                                                           | Anti-haemorrhoid                                                        | ◆    | [9]          |
|                                        |            |                  |                  |   |                              |                                                                                                                                                                                           | Anti-wart                                                               | ◆    | None         |
|                                        |            |                  |                  |   |                              |                                                                                                                                                                                           | Panacea                                                                 | ◆◆◆◆ | [1, 3, 5, 9] |
| <i>Matricaria recutita</i> L. (CQ-118) | Asteraceae | <i>camomilla</i> | German chamomile | W | stems                        | Dried, then made into decoction that is used as an eye wash. Eyes are washed 3 times a day until healed. A cloth compress soaked in this decoction water can also be applied to the eyes. | Anti-conjunctivitis; anti-inflammatory (of eye)                         | ◆◆◆  | [1, 2, 8]    |
|                                        |            |                  |                  |   | aerial parts (or just stems) | Dried, then made into decoction that is used as a facial wash.                                                                                                                            | Face cleansing; anti-acne                                               | ◆    | [10]         |

|                                     |          |               |       |   |                                                                                                                                                                                                 |                                                                                                                                    |                                           |      |       |
|-------------------------------------|----------|---------------|-------|---|-------------------------------------------------------------------------------------------------------------------------------------------------------------------------------------------------|------------------------------------------------------------------------------------------------------------------------------------|-------------------------------------------|------|-------|
|                                     |          |               |       |   | Dried, then made into decoction that is used to wash or bathe babies with heat- or diaper-rash. Some also make the decoction together with the dried aerial parts of <i>Malva sylvestris</i> L. | Anti-dermatitis; anti-rash; anti-inflammatory                                                                                      | ◆                                         | None |       |
|                                     |          |               |       |   | Dried, then made into decoction for washing hair.                                                                                                                                               | Wash for oily hair                                                                                                                 | ◆                                         | None |       |
|                                     |          |               |       |   |                                                                                                                                                                                                 | Hair lightener                                                                                                                     | ◆                                         | None |       |
| <i>Olea europaea</i> L.<br>(CQ-197) | Oleaceae | <i>aulivē</i> | olive | C | leaves                                                                                                                                                                                          | Decoction with rosemary leaves ( <i>Rosmarinus officinalis</i> L.) is used as a foot bath.                                         | Relieve foot swelling                     | ◆    | None  |
|                                     |          |               |       |   | oil                                                                                                                                                                                             | Topically applied to burn wound. This must be done in secret immediately after burn injury occurs.                                 | Vulnerary and emollient (for burn wounds) | ◆◆   | [5-7] |
|                                     |          |               |       |   |                                                                                                                                                                                                 | Rubbed onto the skin several times a day to treat the folk illness <i>Fuoco di Sant'Antonio</i> (St. Anthony's Fire), or shingles. | Anti-shingles; anti-inflammatory          | ◆    | None  |
|                                     |          |               |       |   |                                                                                                                                                                                                 | Rubbed onto the skin of babies with diaper- or heat -rash.                                                                         | Anti-dermatitis; anti-inflammatory        | ◆    | None  |
|                                     |          |               |       |   |                                                                                                                                                                                                 | Rubbed onto the crown of                                                                                                           | Against                                   | ◆    | None  |

|                                                 |                |                    |                       |   |              |                                                                                        |                                                            |    |      |
|-------------------------------------------------|----------------|--------------------|-----------------------|---|--------------|----------------------------------------------------------------------------------------|------------------------------------------------------------|----|------|
|                                                 |                |                    |                       |   |              | baby's head, then hair is brushed with soft brush or comb.                             | cradle-cap (in infants)                                    |    |      |
|                                                 |                |                    |                       |   |              | Warm oil is applied to animal hooves.                                                  | ♣ Vulnerary for cracked hooves or chapped skin near hooves | ♦  | None |
|                                                 |                |                    |                       |   |              | Topical application to diaper area on infants.                                         | Against diaper rash                                        | ♦  | None |
|                                                 |                |                    |                       |   |              | Topical applications to dry skin.                                                      | Emollient                                                  | ♦♦ | [6]  |
|                                                 |                |                    |                       |   |              | Rubbed into the hair and scalp in ritual treatment for scabies and lice.               | Anti-scabies; anti-lice                                    | ♦  | [8]  |
| <i>Origanum heracleoticum</i> L. (CQ-207)       | Lamiaceae      | <i>rigano</i>      | oregano               | W | leaves       | Dried leaves are mixed with olive oil and made into a compress that is applied to jaw. | Against toothache                                          | ♦  | [1]  |
| <i>Oryza sativa</i> L.                          | Poaceae        | <i>riso</i>        | rice                  | C | grains       | Rice grains (store bought) are boiled until over-cooked, then applied topically.       | Suppurative; anti-furuncle; anti-abscess                   | ♦  | None |
| <i>Parietaria diffusa</i> Mert. & Koch (CQ-212) | Urticaceae     | <i>erba vjntě</i>  | pellitory of the wall | W | aerial parts | A decoction of aerial parts is used as a mouth wash.                                   | Against toothache; anti-gingivitis                         | ♦  | None |
| <i>Plantago major</i> L. (CQ-225)               | Plantaginaceae | <i>cintu nirvi</i> | common plantain       | W | leaves       | Fresh leaves are crushed with a stone then applied topically.                          | Anti-rheumatic; anti-arthritic; analgesic; anti-           | ♦♦ | None |

|                                              |              |                   |                       |      |        |                                                                                                                                                                                                                                                                                                                    |                                                                                                   |      |              |
|----------------------------------------------|--------------|-------------------|-----------------------|------|--------|--------------------------------------------------------------------------------------------------------------------------------------------------------------------------------------------------------------------------------------------------------------------------------------------------------------------|---------------------------------------------------------------------------------------------------|------|--------------|
|                                              |              |                   |                       |      |        |                                                                                                                                                                                                                                                                                                                    | inflammatory                                                                                      |      |              |
|                                              |              |                   |                       |      |        |                                                                                                                                                                                                                                                                                                                    | anti-abscess;<br>anti-boil;<br>suppurative                                                        | ◆◆◆◆ | [1, 4, 8, 9] |
|                                              |              |                   |                       |      |        |                                                                                                                                                                                                                                                                                                                    | Vulnerary (for<br>burns)                                                                          | ◆◆◆  | None         |
| <i>Rosmarinus officinalis</i> L.<br>(CQ-113) | Lamiaceae    | <i>rosamarēnē</i> | rosemary              | C, W | leaves | Decoction with olive leaves ( <i>Olea europaea</i> L.) is used as a foot bath.                                                                                                                                                                                                                                     | Relieve foot swelling                                                                             | ◆    | None         |
| <i>Rubus ulmifolius</i> Schott<br>(CQ-164)   | Rosaceae     | <i>mora</i>       | elmleaf<br>blackberry | W    | leaves | A layer of aged pig fat ( <i>Ja sugnē fracidē</i> ) is placed on affected area of skin, and then fresh leaves are placed on top of the fat. This is wrapped with a bandage to hold the leaf and fat in place. (Some also cite the application of the leaf directly to furuncle and abscess without using pig fat.) | Anti-furuncle;<br>vulnerary (for lacerations);<br>anti-abscess;<br>anti-carbuncle;<br>suppurative | ◆◆   | [4, 7]       |
|                                              |              |                   |                       |      |        | Fresh leaves are applied topically to skin to treat dog bite. The leaves are held in place with a bandage.                                                                                                                                                                                                         | Vulnerary and anti-infective (for dog-bite)                                                       | ◆    | None         |
|                                              |              |                   |                       |      | root   | A decoction of the fresh root is made for use as a hair wash.                                                                                                                                                                                                                                                      | Prevent/stop hair loss                                                                            | ◆    | None         |
| <i>Rumex crispus</i> L.<br>(CQ-171)          | Polygonaceae | <i>patsa</i>      | curled dock           | W    | leaves | Leaves are warmed over a fire; the cortex is removed and placed in olive oil.                                                                                                                                                                                                                                      | Vulnerary (for burn wounds)                                                                       | ◆    | None         |

|                                       |           |                 |             |   |              |                                                                                                                  |                                                                       |   |         |
|---------------------------------------|-----------|-----------------|-------------|---|--------------|------------------------------------------------------------------------------------------------------------------|-----------------------------------------------------------------------|---|---------|
|                                       |           |                 |             |   |              | This is topically applied to burn wounds.                                                                        |                                                                       |   |         |
| <i>Ruta graveolens</i> L.             | Rutaceae  | <i>ruta</i>     | rue         | W | aerial parts | Dried then made into a decoction that is used as an external wash for humans and animals.                        | ♣ anti-furuncle; anti-abscess; anti-acne                              | ♦ | None    |
|                                       |           |                 |             |   |              | Decoction of aerial parts is drunk or used as an external wash.                                                  | Panacea                                                               | ♦ | None    |
| <i>Sambucus ebulus</i> L.<br>(CQ-180) | Adoxaceae | <i>Iervolē</i>  | dwarf elder | W | flowers      | When flowers turn black, they are placed in shoes and walked in (without socks) for 3 days.                      | Prevents formation of blisters and foot sores                         | ♦ | None    |
|                                       |           |                 |             |   | fruit        | Juice from mature fruits is applied to open wounds in animals to detract flies and other insects from the wound. | ♣ Fly and insect repellent for open wounds                            | ♦ | [11]    |
|                                       |           |                 |             |   | leaves       | Fresh leaf is wrapped around foot before putting on shoes.                                                       | Prevents formation of blisters; sweat absorbent; "toughens" foot skin | ♦ | [2]     |
| <i>Sambucus nigra</i> L.<br>(CQ-151)  | Adoxaceae | <i>savēuchē</i> | elder       | W | flowers      | Dried then made into infusion for use as a foot bath.                                                            | Vulnerable for foot sores; emollient for dry, cracked feet            | ♦ | [8, 10] |
|                                       |           |                 |             |   | leaves       | Fresh leaves topically applied.                                                                                  | Anti-rheumatic;                                                       | ♦ | [3, 6]  |

|                                |            |                 |        |   |       |                                                                           |                                               |    |               |
|--------------------------------|------------|-----------------|--------|---|-------|---------------------------------------------------------------------------|-----------------------------------------------|----|---------------|
|                                |            |                 |        |   |       |                                                                           | analgesic;<br>Anti-inflammatory               |    |               |
|                                |            |                 |        |   |       |                                                                           | Anti-sting/anti-itch (for insect bites)       | ◆  | [1, 5]        |
|                                |            |                 |        |   |       |                                                                           | Haemostatic (for lacerations)                 | ◆  | None          |
|                                |            |                 |        |   |       |                                                                           | Anti-boil; anti-abscess; suppurative          | ◆  | [7]           |
| <i>Solanum lycopersicum</i> L. | Solanaceae | <i>pomodoro</i> | tomato | C | fruit | Fruit pulp is rubbed onto the skin.                                       | Heals insect stings (from wasps and bees)     | ◆  | None          |
|                                |            |                 |        |   |       |                                                                           | Anti-callus                                   | ◆  | None          |
| <i>Solanum tuberosum</i> L.    | Solanaceae | <i>potata</i>   | potato | C | tuber | Fresh slice of tuber is topically applied.                                | Vulnerary (for burn wounds)                   | ◆◆ | [3, 5, 7, 10] |
|                                |            |                 |        |   |       | Fresh slice of tuber is topically applied.                                | Anti-bruise                                   | ◆  | None          |
|                                |            |                 |        |   |       | Fresh slice of tuber is grated and applied to eyes.                       | Anti-inflammatory (for eyes); eye moisturizer | ◆  | [3, 5, 12]    |
|                                |            |                 |        |   |       | Fresh skin of tuber is peeled off and applied as a compress on the jaw or | Analgesic (against tooth-ache)                | ◆  | None          |

|                                                     |              |                                                           |           |   |        |                                                                                                                                                                                                  |                                                   |    |        |
|-----------------------------------------------------|--------------|-----------------------------------------------------------|-----------|---|--------|--------------------------------------------------------------------------------------------------------------------------------------------------------------------------------------------------|---------------------------------------------------|----|--------|
|                                                     |              |                                                           |           |   |        | cheek over area of toothache pain.                                                                                                                                                               |                                                   |    |        |
|                                                     |              |                                                           |           |   |        | Fresh slice of tuber is placed on the forehead until headache is relieved.                                                                                                                       | Anti-headache                                     | ◆  | [5]    |
| <i>Tussilago farfara</i> L. (CQ-202)                | Asteraceae   | <i>stampē kavalēl</i>                                     | coltsfoot | W | leaves | Fresh leaf topically applied to affected area.                                                                                                                                                   | Anti-furuncle; suppurative                        | ◆  | [3, 7] |
|                                                     |              |                                                           |           |   |        |                                                                                                                                                                                                  | Vulnerary (for burn wounds)                       | ◆  | None   |
|                                                     |              |                                                           |           |   |        | Fresh leaves applied as ritual objects in healing ceremony for <i>pesta cane</i> (dog paw print illness) in which the leaves are laid in a cross over the lower back of infants that won't grow. | Against <i>pesta cane</i> (dog paw print illness) | ◆  | None   |
| <i>Ulmus minor</i> L. (CQ-195)                      | Ulmaceae     | <i>olmo</i>                                               | elm       | W | bark   | Strips of bark are used to make a splint and the bark is tied around the affected limb with the leaves of <i>Allium cepa</i> L.                                                                  | Splint for broken or severely bruised bones       | ◆  | None   |
| <i>Umbilicus rupestris</i> (Salisb.) Dandy (CQ-157) | Crassulaceae | <i>favē alla mersē; grassossē; cuppētieddē; grassognē</i> | navelwort | W | leaves | Fresh leaf is topically applied to affected area. Most cite the extraction, or "peeling off" of the leaf "skin" (epithelium) before using.                                                       | Anti-corn (feet); anti-callus (feet)              | ◆◆ | [7]    |
|                                                     |              |                                                           |           |   |        |                                                                                                                                                                                                  | Heal ingrown toenails                             | ◆◆ | None   |

|                                                            |                       |                  |                     |   |         |                                                                                                                                                                                 |                                                    |   |            |
|------------------------------------------------------------|-----------------------|------------------|---------------------|---|---------|---------------------------------------------------------------------------------------------------------------------------------------------------------------------------------|----------------------------------------------------|---|------------|
|                                                            |                       |                  |                     |   |         |                                                                                                                                                                                 | Anti-furuncle;<br>anti-abscess;<br>suppurative     | ◆ | [1-3, 13]  |
|                                                            |                       |                  |                     |   |         |                                                                                                                                                                                 | Relieves foot<br>swelling; anti-<br>inflammatory   | ◆ | [2]        |
|                                                            |                       |                  |                     |   |         |                                                                                                                                                                                 | Vulnerary<br>(also for<br>lacerations)             | ◆ | None       |
|                                                            |                       |                  |                     |   |         | Fresh leaf is heated and<br>applied to jaw or cheek.                                                                                                                            | Against<br>toothache                               | ◆ | None       |
| <i>Urtica dioica</i> L.<br>(CQ-179)                        | Urticaceae            | <i>ardiga</i>    | common<br>nettle    | W | leaves  | Fresh leaves are topically<br>applied.                                                                                                                                          | Anti-<br>rheumatic;<br>anti-arthritis              | ◆ | [4, 9, 10] |
|                                                            |                       |                  |                     |   |         | Decoction used as hair<br>wash.                                                                                                                                                 | Wash for oily<br>hair;<br>strengthens<br>weak hair | ◆ | [8, 10]    |
| <i>Verbascum<br/>sinuatum</i> L.<br>(CQ-218)               | Scrophularia-<br>ceae | <i>varvaschē</i> | wavyleaf<br>mullein | W | leaves  | Decoction in red wine<br>( <i>Vitis vinifera</i> var.<br><i>aglianico</i> ) is used as a<br>mouth wash and gargle. It<br>isn't swallowed because it<br>is considered poisonous. | Analgesic (for<br>toothache<br>and mouth<br>sores) | ◆ | None       |
| <i>Vitis vinifera</i> var.<br><i>aglianico</i><br>(CQ-209) | Vitaceae              | <i>vē tē</i>     | grape vine          | C | vinegar | Cloth is bathed in vinegar<br>and placed on forehead.                                                                                                                           | Febrifuge                                          | ◆ | None       |
|                                                            |                       |                  |                     |   |         | Hair is washed first with<br>soap and water, then with<br>vinegar.                                                                                                              | Wash for oily<br>hair                              | ◆ | [3]        |
|                                                            |                       |                  |                     |   |         | Mixed with salt and                                                                                                                                                             | Against skin                                       | ◆ | None       |

|                 |                                                                                                                                                                    |                                           |      |      |
|-----------------|--------------------------------------------------------------------------------------------------------------------------------------------------------------------|-------------------------------------------|------|------|
|                 | rubbed on skin.                                                                                                                                                    | nodules; anti-cyst                        |      |      |
|                 | Mixed with salt and used as mouth wash.                                                                                                                            | Against toothache; anti-gingivitis        | ◆    | None |
|                 | Mixed with <i>verderame</i> (oxidized copper, a fungicide used on cultivated plants) and used to treat <i>canero del fatone</i> , or cracked/wounded horse hooves. | ♣ Heals cracked or wounded horse hooves   | ◆    | None |
| wine            | Used to wash wounds and lacerations (for humans and animals).                                                                                                      | ♣ Anti-septic                             | ◆◆◆◆ | [14] |
|                 | Decoction with the leaves of <i>Verbascum sinuatum</i> L. is used as a mouth wash and gargle. It isn't swallowed because it is considered poisonous.               | Analgesic (for toothache and mouth sores) | ◆    | None |
|                 | Mixed with bread crumbs, and then rubbed onto skin to treat contact dermatitis caused by a stinging caterpillar crawling on skin.                                  | Anti-dermatitis; anti-inflammatory        | ◆    | None |
|                 | Applied topically in ritual healing of <i>mal vjntē</i> (wind illness).                                                                                            | Against <i>mal vjntē</i> (wind illness)   | ◆    | None |
| wine or vinegar | Mixed with durum wheat flour, and then used to                                                                                                                     | Cast for broken or                        | ◆    | None |

---

|                                                                                       |                        |
|---------------------------------------------------------------------------------------|------------------------|
| coat a rough canvas material ( <i>stoppe</i> ) to make a hard cast for setting bones. | severely bruised bones |
|---------------------------------------------------------------------------------------|------------------------|

---

*Status*: C: cultivated; SC: semi-cultivated (including plants managed in the wild); W: wild. *Consensus Index/ Spontaneous Quotation Frequency for remedies*:

◆: quoted by < 10% of informants; ◆◆: quoted by 10- 20% of informants; ◆◆◆: quoted by 21-30% of informants; ◆◆◆◆: quoted by 31-40% of informants; ◆◆◆◆◆: quoted by > 41% of informants. ♣: Ethnoveterinary application.

## References

1. Pieroni A, Quave CL: **Traditional pharmacopoeias and medicines among Albanians and Italians in southern Italy: A comparison.** *Journal of Ethnopharmacology* 2005, **101**:258-270.
2. Pieroni A, Quave CL, Santoro RF: **Folk pharmaceutical knowledge in the territory of the Dolomiti Lucane, inland southern Italy.** *Journal of Ethnopharmacology* 2004, **95**:373-384.
3. Pieroni A, Quave C, Nebel S, Heinrich M: **Ethnopharmacy of the ethnic Albanians (Arbëreshë) of northern Basilicata, Italy.** *Fitoterapia* 2002, **73**:217-241.
4. Scherrer AM, Motti R, Weckerle CS: **Traditional plant use in the areas of Monte Vesole and Ascea, Cilento National Park (Campania, Southern Italy).** *Journal of Ethnopharmacology* 2005, **97**:129-143.
5. Passalacqua NG, Guarrera PM, De Fine G: **Contribution to the knowledge of the folk plant medicine in Calabria region (Southern Italy).** *Fitoterapia* 2007, **78**:52-68.
6. De Feo V, Aquino R, Menghini A, Ramundo E, Senatore F: **Traditional phytotherapy in the Peninsula Sorrentina, Campania, southern Italy.** *Journal of Ethnopharmacology* 1992, **36**:113-125.
7. Guarrera PM: **Traditional phytotherapy in Central Italy (Marche, Abruzzo, and Latium).** *Fitoterapia* 2005, **76**:1-25.

8. Guarrera PM, Salerno G, Caneva G: **Folk phytotherapeutical plants from Maratea area (Basilicata, Italy).** *Journal of Ethnopharmacology* 2005, **99**:367-378.
9. Guarrera P, Leporatti L: **Ethnobotanical remarks on Central and Southern Italy.** *Journal of Ethnobiology and Ethnomedicine* 2007, **3**:23.
10. De Feo V, Senatore F: **Medicinal plants and phytotherapy in the Amalfitan Coast, Salerno Province, Campania, southern Italy.** *Journal of Ethnopharmacology* 1993, **39**:39-51.
11. Guarrera PM: **Traditional antihelmintic, antiparasitic and repellent uses of plants in Central Italy.** *Journal of Ethnopharmacology* 1999, **68**:183-192.
12. Guarrera PM: **Food medicine and minor nourishment in the folk traditions of Central Italy (Marche, Abruzzo and Latium).** *Fitoterapia* 2003, **74**:515-544.
13. Palmese MT, Uncini Manganelli RE, Tomei PE: **An ethno-pharmacobotanical survey in the Sarrabus district (south-east Sardinia).** *Fitoterapia* 2001, **72**:619-643.
14. Pieroni A, Howard P, Volpato G, Santoro RF: **Natural remedies and nutraceuticals used in ethnoveterinary practices in inland southern Italy.** *Veterinary Research Communications* 2004, **28**:55-80.
